# Supplementary figures and images for: An Open-label Phase I Study of GDC-0927 in Postmenopausal Women with Locally Advanced or Metastatic Estrogen Receptor–Positive Breast Cancer
Source: Oxford University Press journal article supplement (doi:10.1158/1078-0432.ccr-23-0011), 2023-06-01

**Supplementary Fig. S1.** Study scheme.

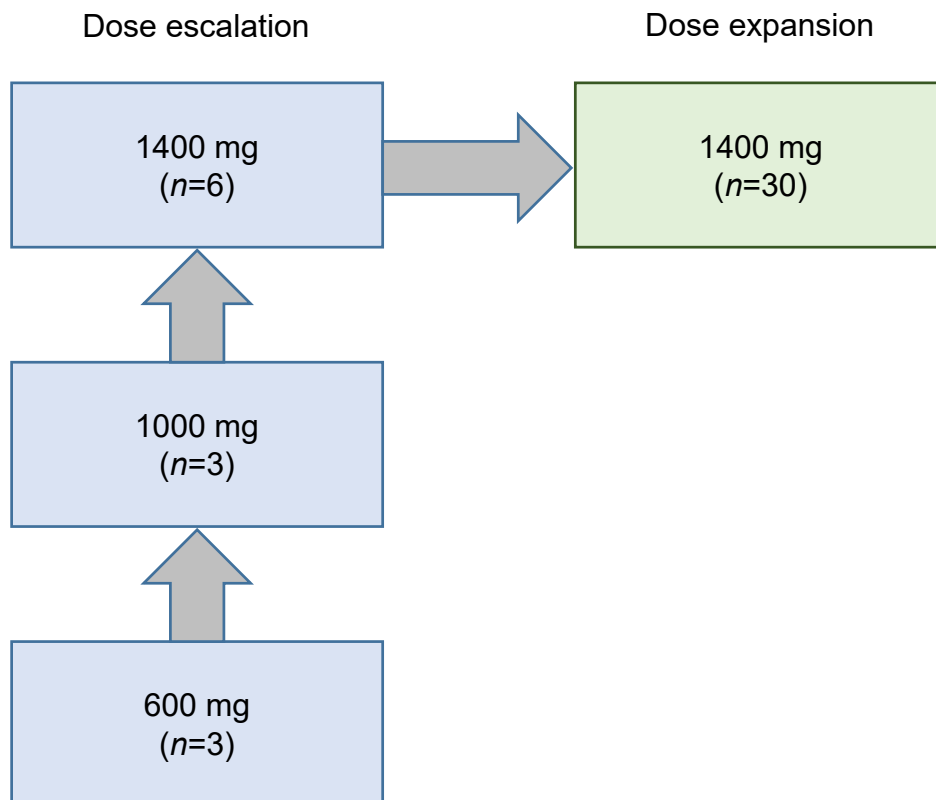

Supplement: ccr-23-0011_supplementary_fig.1_suppsf1.pdf [file ccr-23-0011_supplementary_fig.1_suppsf1.pdf]
